# Supplementary material for: Antibodies Induced by Homologous or Heterologous Inactivated (CoronaVac/BBIBP-CorV) and Recombinant Protein Subunit Vaccines (ZF2001) Dramatically Enhanced Inhibitory Abilities against B.1.351, B.1.617.2, and B.1.1.529 Variants
Source: MDPI journal article supplement (doi:10.3390/vaccines10122110), 2022-12-09
Supplement: s1 [file s1]

## Supplementary information

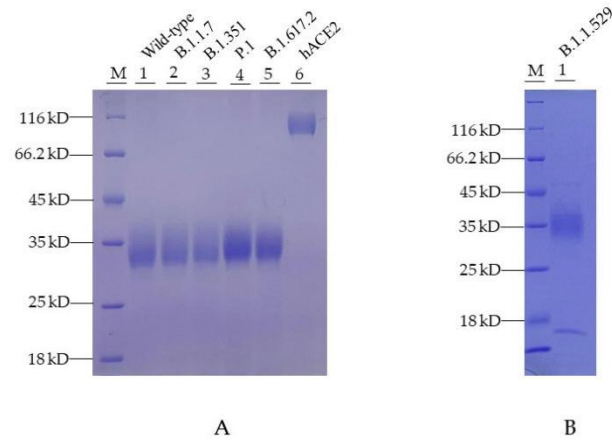

**Figure S1. SDS-PAGE of SARS-CoV-2 wild-type and mutant strains spiking proteins' RBD recombination proteins and hACE2 recombination protein.**

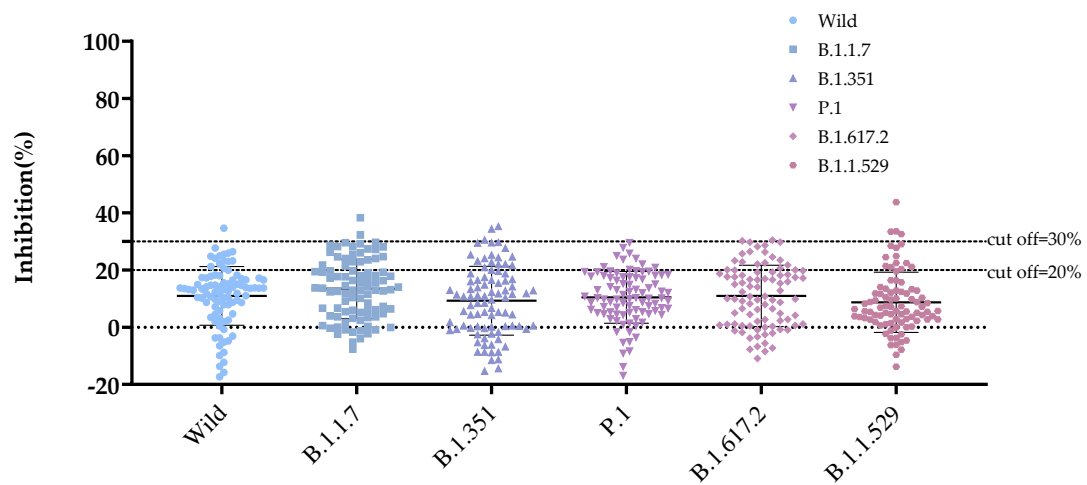

**Figure S2. Enzyme-linked immunoassay competition test determined the negative cutoff value from testing over negative (n=89) human serum against all variants (wild-type, B.1.1.7, B.1.351, P.1, B.1.617.2, and B.1.1.529). Dashed lines indicated 20% or 30% cut-off. As the negative cutoff value was 30%, competition test specificity against wild-type, B.1.1.7, B.1.351, P.1, B.1.617.2, and B.1.1.529 were 98.88%, 97.75%, 96.63%, 100.00%, 97.75%, 95.51%, respectively.**

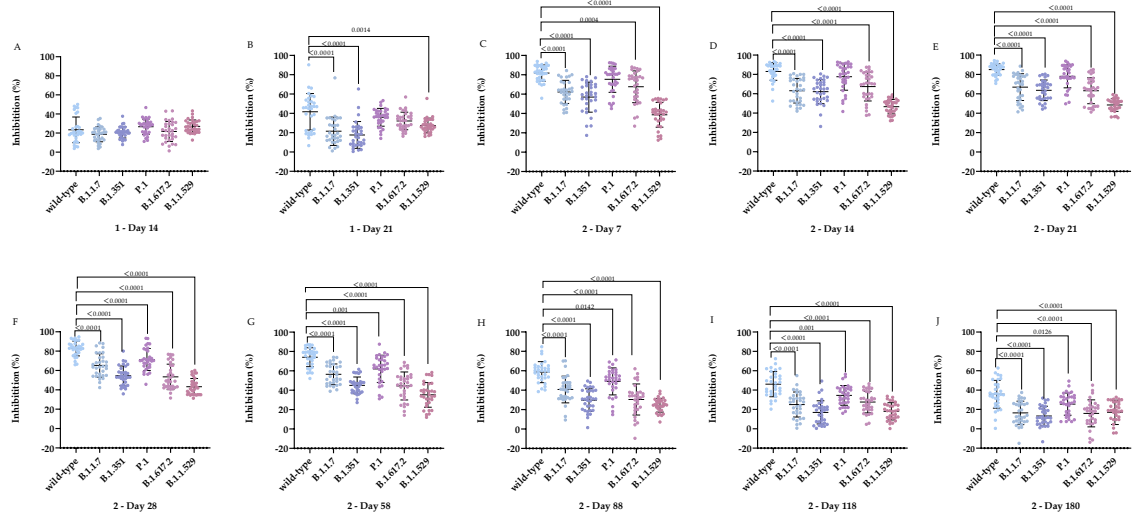

**Figure S3.** The average inhibition rates of the serum samples of 32 volunteers to wild-type and mutant strains at each time point were analyzed and the P values were presented. Specific antibodies in vaccinated serum demonstrate inhibitory abilities for wild-type and mutant strains at the same time point. (A) 1-Day14. (B) 1-Day21. (C) 2-Day7. (D) 2-Day14. (E) 2-Day21. (F) 2-Day28. (G) 2-Day58. (H) 2-Day88. (I) 1-Day118. (J) 1-Day180.

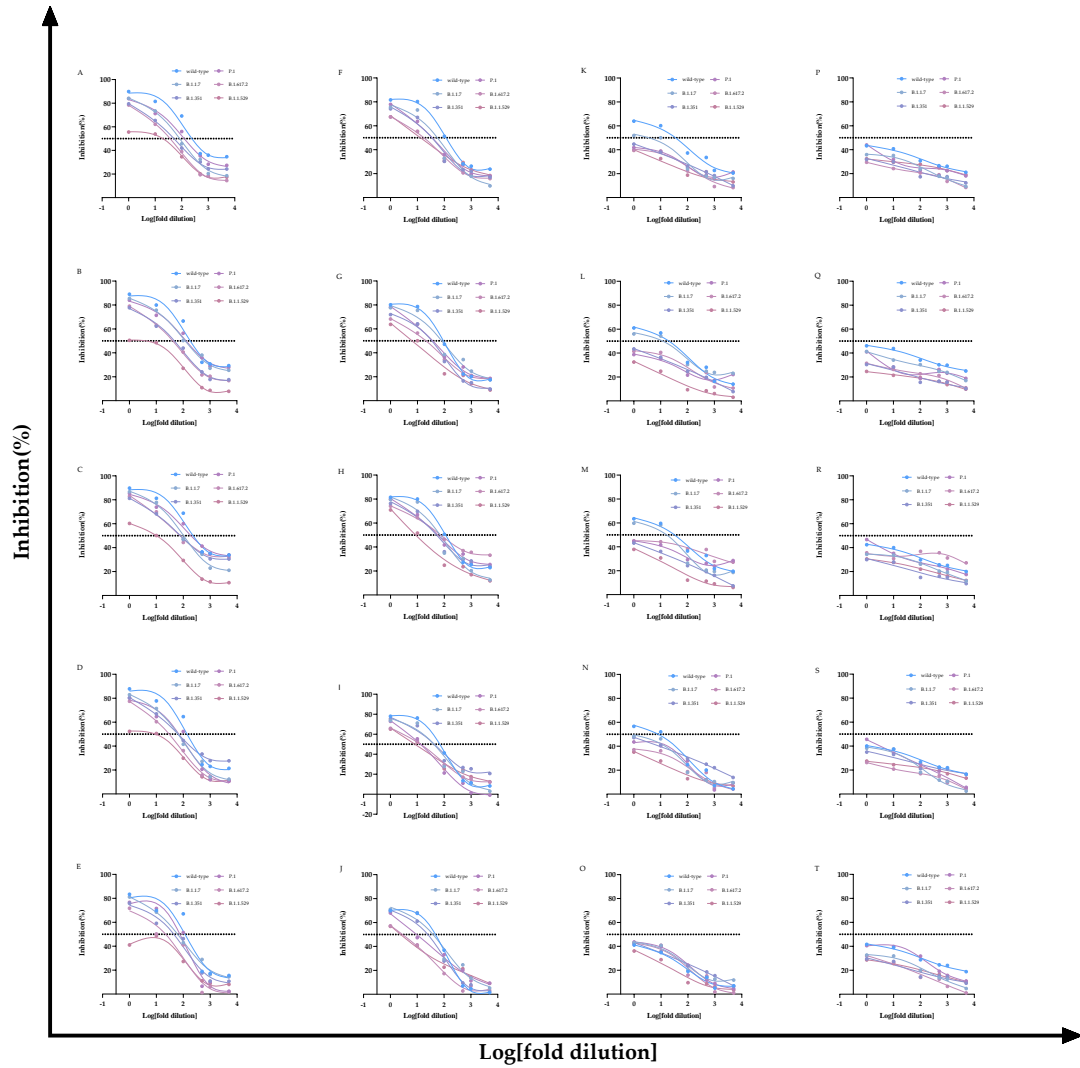

**Figure S4.** Inhibition curves of each of the serum from volunteers (n=5) with receiving the two primary inactivated vaccine were shown. A-E: serum collected on the 1st month after two primary inactivated vaccine, F-J: serum collected on the 2nd month after two primary inactivated vaccine, K-O: serum collected on the 3rd month after two primary inactivated vaccine, P-T: serum collected on the 5th month after two primary inactivated vaccine.

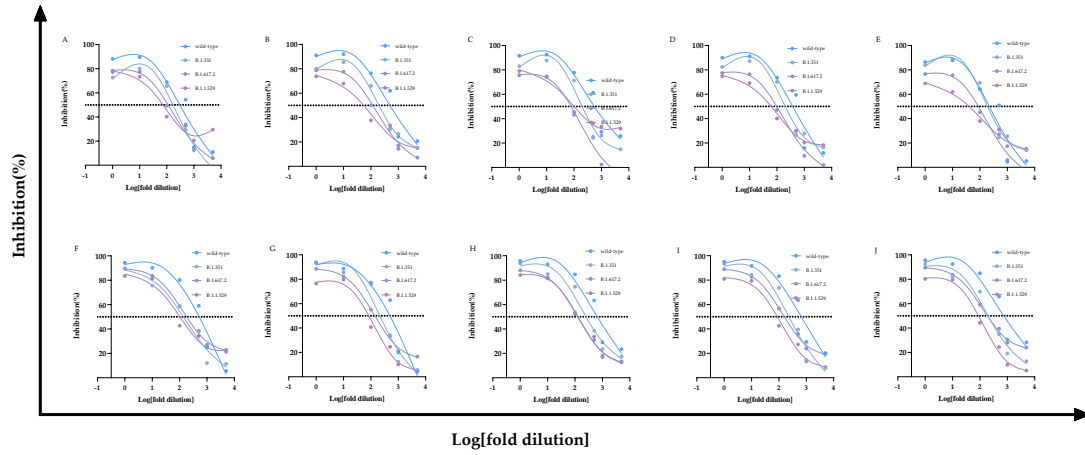

Figure S5. Inhibition curves of each of the serum from volunteers (n=5) on the first month after receiving booster vaccine (CoronaVac/BBIBP-CorV) and ZF2001 are shown. A-E: CoronaVac/BBIBP-CorV booster, F-J: ZF2001.

Table S1. Differences of inhibition rates of primary inactivated (CoronaVac/BBIBP-CorV) vaccine.

|                         | 1 – 3 <sup>rd</sup> week |         | 2 – 1 <sup>st</sup> month |         | 2 – 3 <sup>rd</sup> month |         | 2 – 5 <sup>th</sup> month |         |
|-------------------------|--------------------------|---------|---------------------------|---------|---------------------------|---------|---------------------------|---------|
| wild-type vs. B.1.1.7   | ns                       | 0.985   | ****                      | <0.0001 | ****                      | <0.0001 | ***                       | 0.0001  |
| wild-type vs. B.1.351   | ****                     | <0.0001 | ****                      | <0.0001 | ****                      | <0.0001 | ****                      | <0.0001 |
| wild-type vs. P.1       | ****                     | <0.0001 | ****                      | <0.0001 | ****                      | <0.0001 | ****                      | <0.0001 |
| wild-type vs. B.1.617.2 | ns                       | 0.542   | ****                      | <0.0001 | ****                      | <0.0001 | ****                      | <0.0001 |
| wild-type vs. B.1.1.529 | **                       | 0.0013  | ****                      | <0.0001 | ****                      | <0.0001 | ****                      | <0.0001 |
| B.1.1.7 vs. B.1.351     | ****                     | <0.0001 | ****                      | <0.0001 | ****                      | <0.0001 | ns                        | 0.3604  |
| B.1.1.7 vs. P.1         | ****                     | <0.0001 | **                        | 0.008   | **                        | 0.0025  | ns                        | 0.9993  |
| B.1.1.7 vs. B.1.617.2   | ns                       | 0.9066  | ****                      | <0.0001 | ****                      | <0.0001 | ****                      | <0.0001 |
| B.1.1.7 vs. B.1.1.529   | *                        | 0.0127  | ****                      | <0.0001 | ****                      | <0.0001 | ****                      | <0.0001 |
| B.1.351 vs. P.1         | *                        | 0.0314  | **                        | 0.0058  | *                         | 0.0474  | ns                        | 0.653   |
| B.1.351 vs. B.1.617.2   | **                       | 0.0033  | ***                       | 0.0003  | ns                        | 0.998   | *                         | 0.023   |

|                                |      |         |      |         |      |         |      |         |
|--------------------------------|------|---------|------|---------|------|---------|------|---------|
| <b>B.1.351 vs. B.1.1.529</b>   | ns   | 0.5641  | **** | <0.0001 | ***  | 0.0003  | ***  | 0.0003  |
| <b>P.1 vs. B.1.617.2</b>       | **** | <0.0001 | **** | <0.0001 | **   | 0.0099  | ***  | 0.0005  |
| <b>P.1 vs. B.1.1.529</b>       | **** | <0.0001 | **** | <0.0001 | **** | <0.0001 | **** | <0.0001 |
| <b>B.1.617.2 vs. B.1.1.529</b> | ns   | 0.216   | *    | 0.0189  | ***  | 0.0009  | ns   | 0.9937  |

NS = not significant

**Table S2. The average inhibition rates of serum samples of 32 volunteers collected at different time intervals against wild-type and mutant strains B.1.1.7, B.1.351, P.1, B.1.617.2, and B.1.1.529.**

| Date              | Inhibition (%) |         |         |       |           |           |
|-------------------|----------------|---------|---------|-------|-----------|-----------|
|                   | wild-type      | B.1.1.7 | B.1.351 | P.1   | B.1.617.2 | B.1.1.529 |
| <b>1-Day 14</b>   | 23.41          | 18.76   | 20.78   | 26.65 | 21.67     | 27.07     |
| <b>1- Day 21</b>  | 41.63          | 21.54   | 17.70   | 35.98 | 32.11     | 27.42     |
| <b>2- Day 7</b>   | 81.71          | 62.29   | 56.91   | 75.32 | 67.63     | 38.65     |
| <b>2- Day 14</b>  | 83.04          | 63.14   | 62.17   | 77.64 | 67.45     | 46.62     |
| <b>2- Day 21</b>  | 85.02          | 66.95   | 63.62   | 78.09 | 63.21     | 48.52     |
| <b>2- Day 28</b>  | 82.74          | 65.21   | 54.67   | 71.38 | 53.42     | 43.26     |
| <b>2- Day 58</b>  | 74.09          | 56.46   | 45.01   | 62.10 | 44.41     | 35.22     |
| <b>2- Day 88</b>  | 58.61          | 40.71   | 29.78   | 49.05 | 30.45     | 24.49     |
| <b>2- Day 118</b> | 46.13          | 25.10   | 17.00   | 34.55 | 27.61     | 18.06     |
| <b>2- Day 180</b> | 35.71          | 16.45   | 13.23   | 25.59 | 15.97     | 17.08     |

**Table S3. Differences of inhibition rates of inhibition of booster vaccine.**

|                         | Inactivated<br>Booster -1st<br>month |         | ZF2001 Booster<br>-1st<br>month |         | Inactivated<br>Booster-2st<br>month |         |
|-------------------------|--------------------------------------|---------|---------------------------------|---------|-------------------------------------|---------|
| wild-type vs. B.1.351   | ****                                 | <0.0001 | ****                            | <0.0001 | *                                   | 0.0127  |
| wild-type vs. B.1.617.2 | ****                                 | <0.0001 | ****                            | <0.0001 | ****                                | <0.0001 |
| wild-type vs. B.1.1.529 | ****                                 | <0.0001 | ****                            | <0.0001 | ****                                | <0.0001 |
| B.1.351 vs. B.1.617.2   | ns                                   | 0.4473  | ns                              | 0.1729  | ns                                  | 0.384   |
| B.1.351 vs. B.1.1.529   | *                                    | 0.0119  | ns                              | 0.1561  | ns                                  | 0.2843  |
| B.1.617.2 vs. B.1.1.529 | ns                                   | 0.3384  | ns                              | 0.991   | ns                                  | 0.9972  |

NS = not significant

**Table S4. Inhibiting activity of the two primary vaccine-induced against wild-type, B.1.1.7, B.1.351, P.1, B.1.617.2, and B.1.1.529.**

| Date/volunteers |           | IC50    |         |        |           |           |
|-----------------|-----------|---------|---------|--------|-----------|-----------|
| the 1st month   | wild-type | B.1.1.7 | B.1.351 | P.1    | B.1.617.2 | B.1.1.529 |
| 1#              | 358.90    | 75.41   | 51.08   | 130.60 | 28.50     | 5.64      |
| 2#              | 228.20    | 129.40  | 34.92   | 138.30 | 33.80     | 2.47      |
| 3#              | 334.00    | 103.40  | 97.52   | 254.10 | 114.80    | 5.52      |
| 4#              | 137.90    | 49.94   | 71.78   | 43.46  | 21.85     | 3.25      |
| 5#              | 89.38     | 48.43   | 25.35   | 41.36  | 10.81     | 0.99      |
| the 2nd month   | wild-type | B.1.1.7 | B.1.351 | P.1    | B.1.617.2 | B.1.1.529 |
| 6#              | 107.50    | 36.83   | 26.50   | 32.36  | 12.30     | 13.85     |
| 7#              | 69.70     | 62.99   | 19.43   | 34.25  | 15.02     | 6.26      |

|               |           |         |         |       |           |           |
|---------------|-----------|---------|---------|-------|-----------|-----------|
| 8#            | 100.20    | 53.74   | 48.02   | 63.23 | 86.58     | 10.51     |
| 9#            | 42.18     | 24.69   | 36.14   | 9.90  | 9.07      | 8.16      |
| 10#           | 26.33     | 25.32   | 15.18   | 8.95  | 3.09      | 2.33      |
| the 3rd month | wild-type | B.1.1.7 | B.1.351 | P.1   | B.1.617.2 | B.1.1.529 |
| 11#           | 22.74     | 3.49    | 0.59    | 0.35  | 0.52      | 0.12      |
| 12#           | 12.20     | 7.10    | 0.50    | 0.07  | 0.64      | 0.12      |
| 13#           | 20.55     | 9.82    | 0.48    | 0.29  | 0.56      | 0.26      |
| 14#           | 5.95      | 2.20    | 0.88    | 1.56  | 0.40      | 0.11      |
| 15#           | 0.59      | 0.86    | 0.46    | 1.24  | 1.12      | 0.26      |
| the 5th month | wild-type | B.1.1.7 | B.1.351 | P.1   | B.1.617.2 | B.1.1.529 |
| 16#           | /         | /       | /       | /     | /         | /         |
| 17#           | /         | /       | /       | /     | /         | /         |
| 18#           | /         | /       | /       | /     | /         | /         |
| 19#           | /         | /       | /       | /     | /         | /         |
| 20#           | /         | /       | /       | /     | /         | /         |

IC<sub>50</sub> indicates inhibition concentration 50%. IC<sub>50</sub> and values were determined using GraphPad Prism 8.0.2 software. /: Not matching result with IC<sub>50</sub>.

**Table S5. Inhibiting activity of the homologous inactivated booster or heterologous (ZF2001) booster vaccine-induced against wild-type, B.1.351, B.1.617.2 and B.1.1.529.**

| IC <sub>50</sub>            |           |         |           |           |  |
|-----------------------------|-----------|---------|-----------|-----------|--|
| the 1st month after booster |           |         |           |           |  |
| dose                        | wild-type | B.1.351 | B.1.617.2 | B.1.1.529 |  |
| 1#                          | 292.7     | 130.7   | 83.36     | 71.03     |  |

|                      |     |        |        |        |       |
|----------------------|-----|--------|--------|--------|-------|
|                      | 2#  | 516.9  | 201.4  | 88.91  | 39.69 |
| CoronaVac/BBIBP-CorV | 3#  | 618.7  | 216.1  | 50.09  | 123.7 |
| booster              | 4#  | 368.4  | 220.6  | 68.93  | 48.11 |
|                      | 5#  | 203.9  | 204.0  | 58.30  | 26.92 |
|                      | 6#  | 450.4  | 122.6  | 207.3  | 106.7 |
|                      | 7#  | 411.70 | 211.60 | 141.30 | 61.06 |
| ZF2001 booster       | 8#  | 686.8  | 278.8  | 120.0  | 118.6 |
|                      | 9#  | 649.00 | 225.80 | 169.10 | 70.53 |
|                      | 10# | 800.1  | 201.6  | 221.9  | 69.13 |

IC50 indicates inhibition concentration 50%. IC50 and values were determined using GraphPad Prism 8.0.2 software.
